# Supplementary material for: Facile fabrication of stable wettability gradients on elastomeric surfaces for applications in water collection and controlled cell adhesion
Source: Royal Society of Chemistry journal article supplement (doi:10.1039/d3sm00441d), 2023-01-01
Supplement: d3sm00441d4.pdf [file d3sm00441d4.pdf]

## Supplementary Information

### Facile fabrication of stable wettability gradients on elastomeric surfaces for applications in water collection and controlled cell adhesion

Soorya S. Raj<sup>a</sup>, Romina Marie Mathew<sup>a</sup>, Deljo Davis<sup>a</sup>, Subramanyan Namboodiri Varanakkottu<sup>b</sup>, Asha Srinivasan<sup>c</sup> and Vinod T. P. <sup>a\*</sup>

<sup>a</sup>Department of Chemistry, CHRIST (Deemed to be University), Hosur Road, Bengaluru 560029, India.

<sup>b</sup>Department of Physics, National Institute of Technology Calicut, India – 673601.

<sup>c</sup>Division of Nanoscience and Technology. School of Life Sciences. JSS Academy of Higher Education and Research, Mysore 570015. Karnataka, India.

\*E-mail: vinod.tp@christuniversity.in

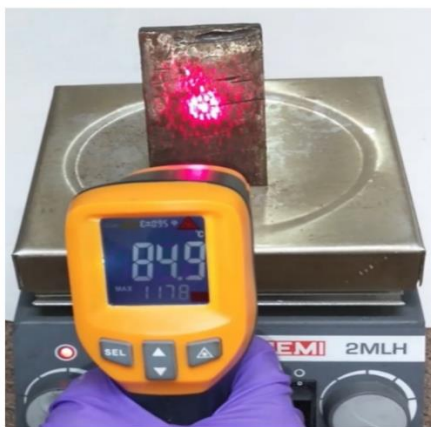

**Figure S1.** Temperature measurements using IR thermometer.

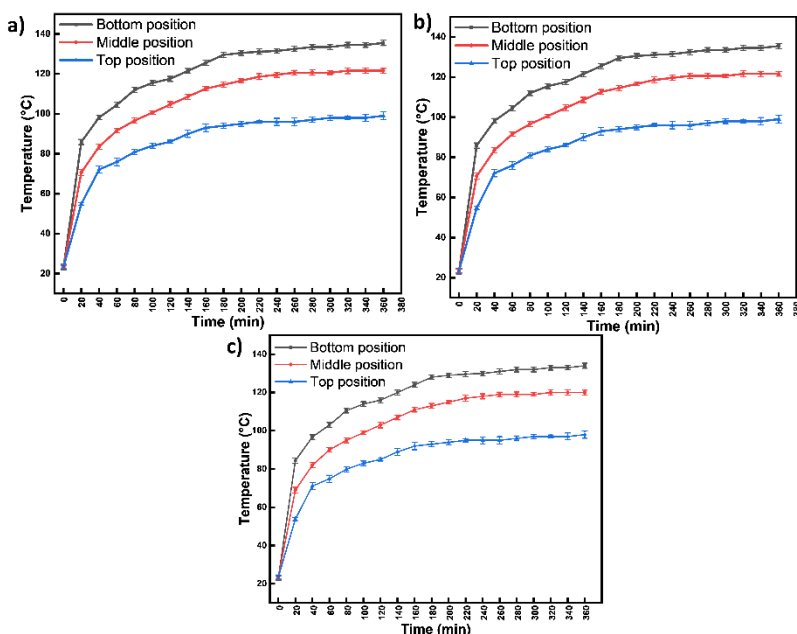

**Figure S2.** Time-temperature graph of a) metal surface, b) glass surface placed over metal piece, and c) PDMS surface supported on glass slide placed over metal piece.

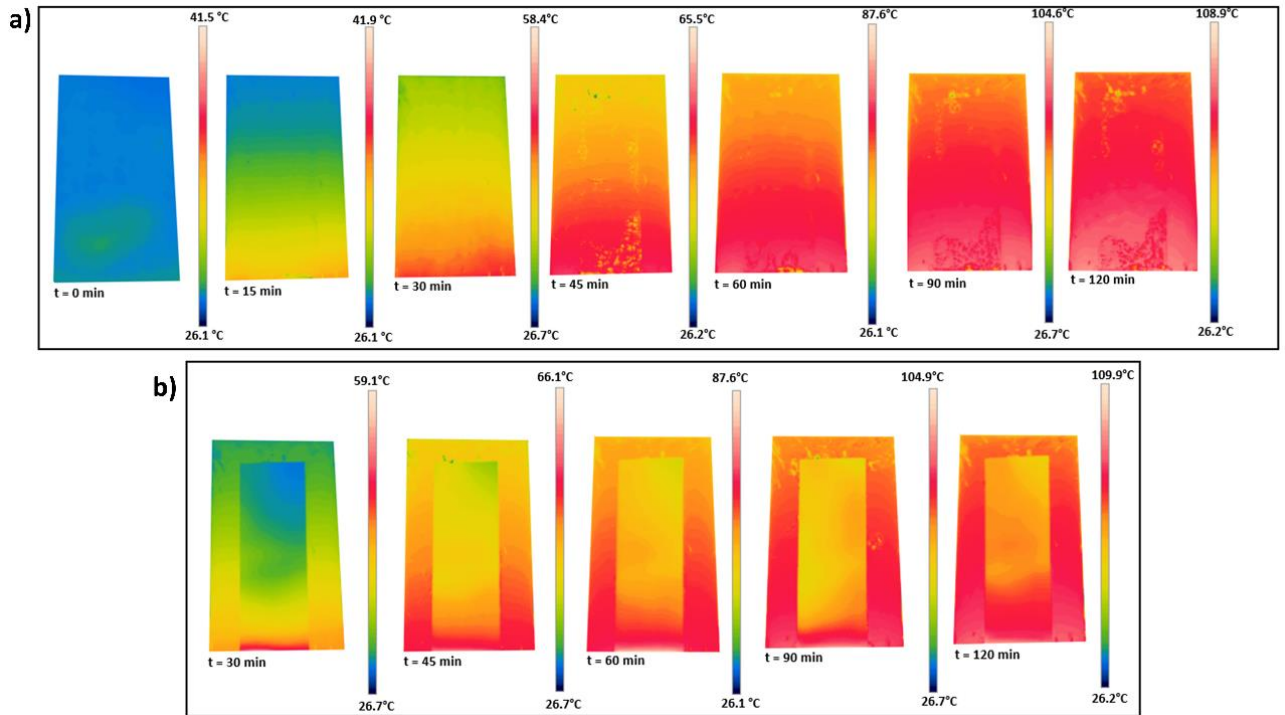

**Figure S3.** Thermal images of (a) slanted metal surface and (b) PDMS surface supported on glass slide placed over slanted metal surface, subjected to differential heating for different durations.

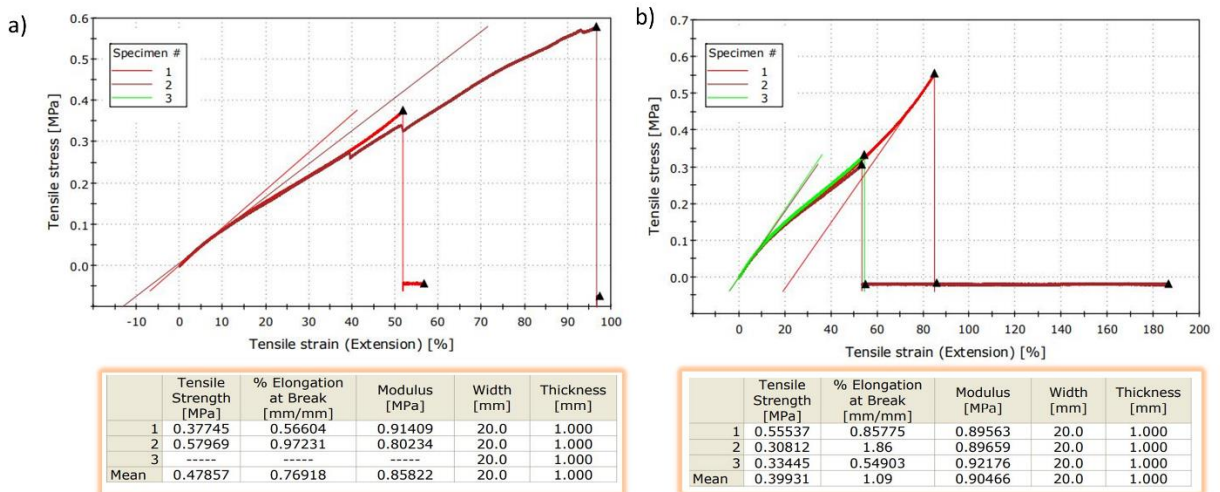

**Figure S4.** Stress-strain curves of PDMS samples with elastomer curing agent ratio (a) 20:1 and (b) 15:1.

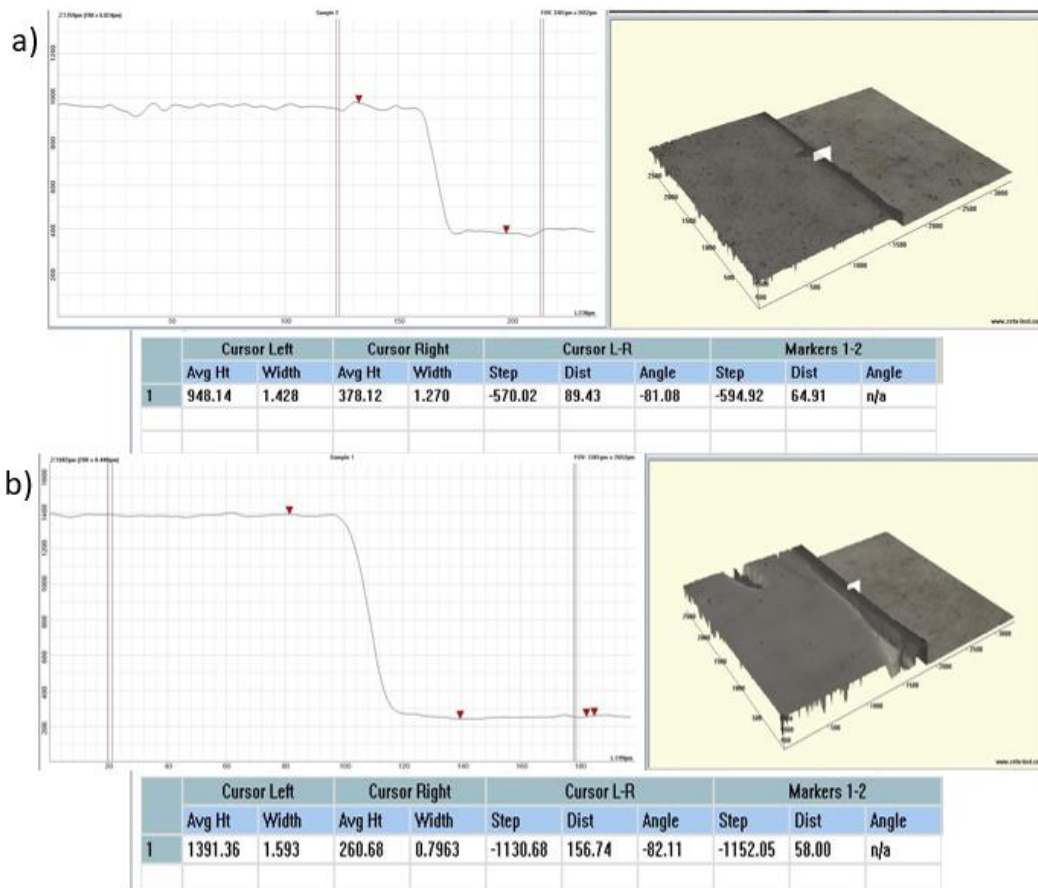

**Figure S5.** Thickness measurements of PDMS film a)  $\approx 0.5\text{mm}$  thickness b)  $\approx 1\text{ mm}$  thickness.

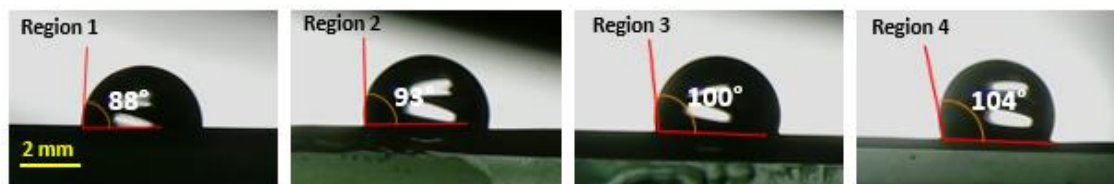

**Figure S6.** Contact angle measurements of wettability gradients formed on Ecoflex 00-30 Platinum Cure Silicone Rubber Compound.

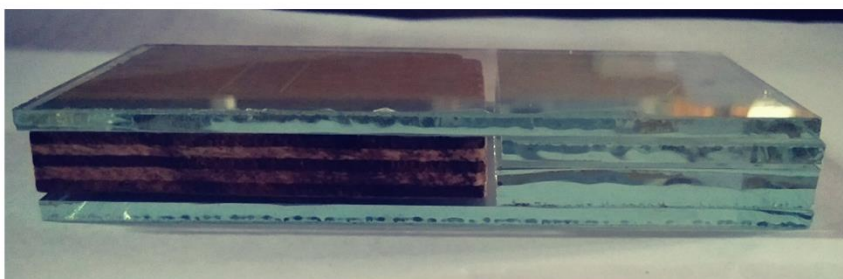

**Figure S7.** Experimental set up of differentially cured PDMS above a plane surface.

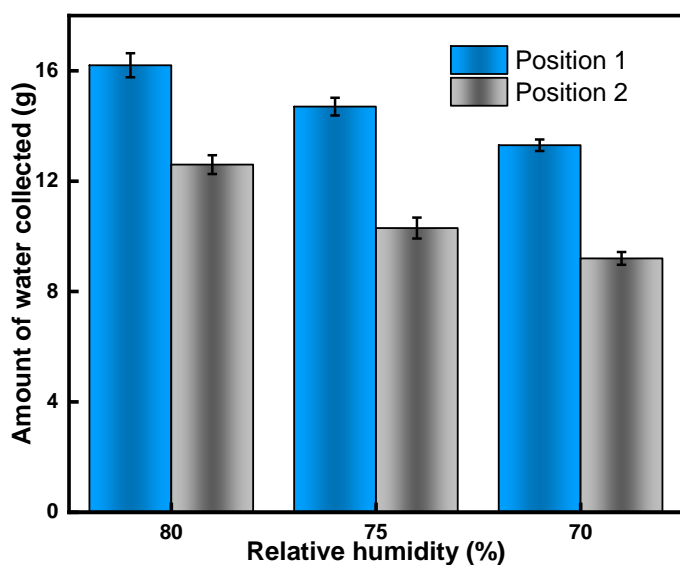

**Figure S8.** Overall amount of water collected over the period of 1 h with two different positions of wettability gradient samples at various relative humidities

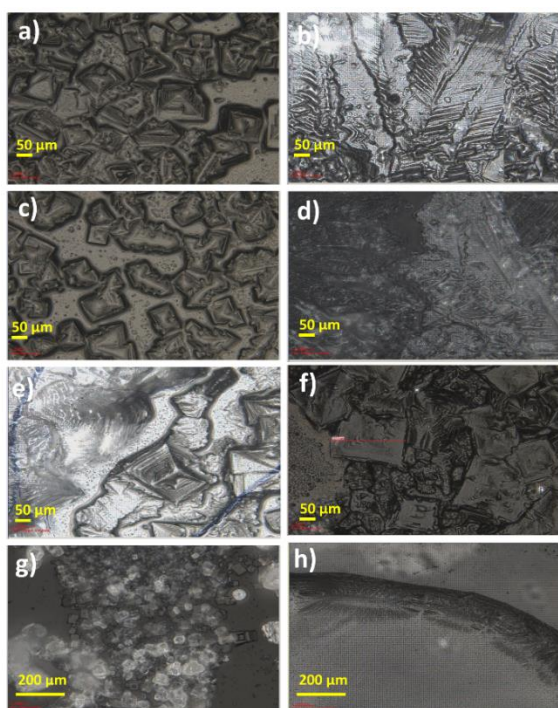

**Figure S9 . a)** Higher extend of salt crystallization from sugar-salt solution on less hydrophobic end on gradient film, **b)** Higher extend of sugar crystallization from sugar-salt solution on hydrophobic end on the gradient film, **c)** salt crystallization from salt solution on less hydrophobic end on gradient film, **d)** sugar crystallization from sugar solution on hydrophobic end on gradient film, **e-f)** crystallization from sugar-salt solution on different positions on a normal film, **g)** salt crystallization from salt solution on a normal film, **h)** sugar crystallization from sugar solution on a normal film.

**Movie S1.** Time taken for initial droplet nucleation and movement on the hydrophobic region of the gradient PDMS film.

**Movie S2.** Time taken for initial droplet nucleation and movement on the less hydrophobic region of the gradient PDMS film.

**Movie S3.** Time taken for initial droplet nucleation and movement on the plain PDMS film.

**Table S1.** Wettability gradient surfaces reported in the literature.

| <b>SI. No</b> | <b>Material Used</b>                             | <b>Fabrication method</b>                      | <b>Applications</b>                | <b>Stability</b>                   | <b>Reference</b> |
|---------------|--------------------------------------------------|------------------------------------------------|------------------------------------|------------------------------------|------------------|
| 1.            | Polished silicon wafer<br>1992                   | Vapour diffusion                               | Droplet movement                   | Not mentioned                      | [1]              |
| 2.            | Flat hydrophilic silicon dioxide surface<br>1986 | Solvent diffusion                              | Protein and polymer adsorption     | Not mentioned                      | [2]              |
| 3.            | Oxidized silicon wafer                           | Microcontact printing                          | Microfluidics                      | Not mentioned                      | [3]              |
| 4.            | Silicon wafer                                    | UVO treatment                                  | Secondary ion imaging              | Not mentioned                      | [4]              |
| 5.            | Poly(methyl methacrylate) sheet                  | Laser cutting                                  | Electrolysis and gas collection    | Not mentioned                      | [5]              |
| 6.            | Brass sheet                                      | Laser texturing                                | Chemical sensing                   | Super hydrophobicity after 17 days | [6]              |
| 7.            | PDMS sheet                                       | Photolithography and plasma etching            | Underwater air bubble manipulation | Not mentioned                      | [7]              |
| 8.            | Silicon wafer                                    | Photolithography and deep reactive ion etching | Water vapor condensation           | Not mentioned                      | [8]              |
| 9.            | Graphite plate                                   | Electrochemical oxidation                      | Water droplet manipulation         | Not mentioned                      | [9]              |
| 10.           | Aluminium plate                                  | Gradual substrate moves and vapor deposition   | Steam condensation heat transfer   | Not mentioned                      | [10]             |
| 11.           | Silicon wafer                                    | Photolithography                               | Water droplet manipulation         | Not mentioned                      | [11]             |
| 12.           | Nickel-titanium sheet                            | Laser etching                                  | Antiadhesion of protein and cells  | Not mentioned                      | [12]             |
| 13.           | Aluminium sheet                                  | Laser scanning                                 | Underwater air bubble manipulation | Not mentioned                      | [13]             |

|     |                                |                                                                          |                                                                   |               |      |
|-----|--------------------------------|--------------------------------------------------------------------------|-------------------------------------------------------------------|---------------|------|
| 14. | Glass                          | Printing and oil infusion                                                | Water condensation, and dust-cleaning                             | Not mentioned | [14] |
| 15. | Glass, cloth, and filter paper | Photolithography and UV treatment                                        | Water droplet manipulation                                        | Not mentioned | [15] |
| 16. | Copper wires                   | Electrochemical corrosion combined with the gradual solution-rise method | Fog collection                                                    | Not mentioned | [16] |
| 17. | Silicon wafer                  | Vapor diffusion                                                          | Steam condensation                                                | Not mentioned | [17] |
| 18. | Copper plate                   | Laser cutting and vapor deposition                                       | Steam condensation heat transfer                                  | Not mentioned | [18] |
| 19. | Silicon wafer                  | Vapor diffusion                                                          | Manipulation of low surface tension fluids and their condensation | Not mentioned | [19] |
| 20. | Polymer surfaces               | 3D printing                                                              | Control droplet movement                                          | Not mentioned | [20] |
| 21. | Elastomeric PDMS               | Plasma exposure                                                          | Smart droplet-based assays                                        | Not mentioned | [21] |
| 22. | PDMS                           | Photolithography and soft lithography                                    | Controlled droplet manipulation                                   | Not mentioned | [22] |

---

**Table S2.** Contact angle measurements of PDMS samples prepared with different amounts of curing agent.

| Time (min) | Contact angle measurements of samples cured at 80°C                                        |                                                                                             |                                                                                              |
|------------|--------------------------------------------------------------------------------------------|---------------------------------------------------------------------------------------------|----------------------------------------------------------------------------------------------|
|            | PDMS : curing agent<br>10: 1                                                               | PDMS : curing agent<br>15: 1                                                                | PDMS : curing agent<br>20: 1                                                                 |
| 15         | ≈ 43°<br> | ≈ 38°<br> | ≈ 31°<br> |
| 30         | 84°<br>   | 79°<br>   | 72°<br>   |
| 45         | 99°<br>   | 95°<br>   | 86°<br>   |
| 60         | 101°<br> | 99°<br>  | 95°<br>  |

**Table S3.** Time-temperature study of PDMS placed over different substrates such as wood, glass and aluminium.

| Time (min) | Temperature (°C) |                |       |
|------------|------------------|----------------|-------|
|            | Wood             | Aluminium foil | Glass |
| 0          | 26.7             | 26.9           | 26.3  |
| 15         | 31.5             | 32.4           | 34.9  |
| 30         | 53.5             | 56.7           | 70.9  |
| 45         | 58               | 63             | 77    |
| 60         | 75               | 79             | 106   |



**Table S4.** Temperature dependent curing time of PDMS (As per the technical data sheet of Sylgard 184, Dow Corning)

| Si No. | Curing temperature (°C) | Time     |
|--------|-------------------------|----------|
| 1      | 25                      | 48 hours |
| 2      | 100                     | 35 min   |
| 3      | 125                     | 20 min   |
| 4      | 150                     | 10 min   |

## References

- [1] C. M. K., W. G. M., *Science (80-. )*. **1992**, *256*, 1539–1541.
- [2] H. Elwing, S. Welin, A. Askendal, U. Nilsson, I. Lundström, *J. Colloid Interface Sci.* **1987**, *119*, 203–210.
- [3] S.-H. Choi, B. Zhang Newby, *Langmuir* **2003**, *19*, 7427–7435.
- [4] S. V Roberson, A. J. Fahey, A. Sehgal, A. Karim, *Appl. Surf. Sci.* **2002**, *200*, 150–164.
- [5] X. Xiao, S. Li, X. Zhu, X. Xiao, C. Zhang, F. Jiang, C. Yu, L. Jiang, *Nano Lett.* **2021**, *21*, 2117–2123.
- [6] V. D. Ta, A. Dunn, T. J. Wasley, J. Li, R. W. Kay, J. Stringer, P. J. Smith, E. Esenturk, C. Connaughton, J. D. Shephard, *Appl. Surf. Sci.* **2016**, *371*, 583–589.
- [7] M. Chen, Z. Jia, T. Zhang, Y. Fei, *Soft Matter* **2018**, *14*, 7462–7468.
- [8] Y. Zhao, C. Yang, *Appl. Therm. Eng.* **2017**, *121*, 136–145.
- [9] K. M. Ashleya, J. C. Meredith, E. Amis, D. Raghavana, A. Karim, *Polymer (Guildf)*. **2002**, *44*, 769–772.
- [10] Z. Deng, S. Gao, H. Wang, X. Liu, C. Zhang, *Int. J. Heat Mass Transf.* **2022**, *184*, 122331.
- [11] M. Kumar, R. Bhardwaj, K. C. Sahu, *Langmuir* **2020**, *36*, 5312–5323.
- [12] Q. Zhang, J. Dong, M. Peng, Z. Yang, Y. Wan, F. Yao, J. Zhou, C. Ouyang, X. Deng, H. Luo, *Mater. Sci. Eng. C* **2020**, *111*, 110847.
- [13] Z. Zheng, H. Yang, Y. Cao, Z. Dai, *ACS Omega* **2020**, *5*, 718–725.
- [14] B. Tang, C. Meng, L. Zhuang, J. Groenewold, Y. Qian, Z. Sun, X. Liu, J. Gao, G. Zhou, *ACS Appl. Mater. Interfaces* **2020**, *12*, 38723–38729.
- [15] H. Wu, K. Zhu, B. Cao, Z. Zhang, B. Wu, L. Liang, G. Chai, A. Liu, *Soft Matter* **2017**, *13*, 2995–3002.

- [16] J. Li, X. Tian, A. P. Perros, S. Franssila, V. Jokinen, *Adv. Mater. Interfaces* **2014**, *1*, 1400001.
- [17] S. Daniel, M. K. Chaudhury, J. C. Chen, *Science (80-. )*. **2001**, *291 5504*, 633–636.
- [18] T. Abbasiasl, M. M. Chehrghani, A. K. Sadaghiani, A. Koşar, *Int. J. Heat Mass Transf.* **2021**, *179*, 121664.
- [19] L. Zhang, Z. Guo, J. Sarma, W. Zhao, X. Dai, *Adv. Funct. Mater.* **2021**, *31*, 2008614.
- [20] J. Sung, H. M. Lee, G. H. Yoon, S. Bae, H. So, *Int. J. Precis. Eng. Manuf. Technol.* **2022**, DOI 10.1007/s40684-022-00418-y.
- [21] H. Chen, D. Li, X. Li, in *2022 IEEE 17th Int. Conf. Nano/Micro Eng. Mol. Syst.*, **2022**, pp. 157–161.
- [22] S. H. Lee, B. S. Kang, M. K. Kwak, *ACS Appl. Mater. Interfaces* **2022**, *14*, 14721–14728.
